# Supplementary material
Source: PubMed Central journal article supplement (PMC8895883)
Supplement: NIHMS1775124-supplement-1.pdf [file NIHMS1775124-supplement-1.pdf]

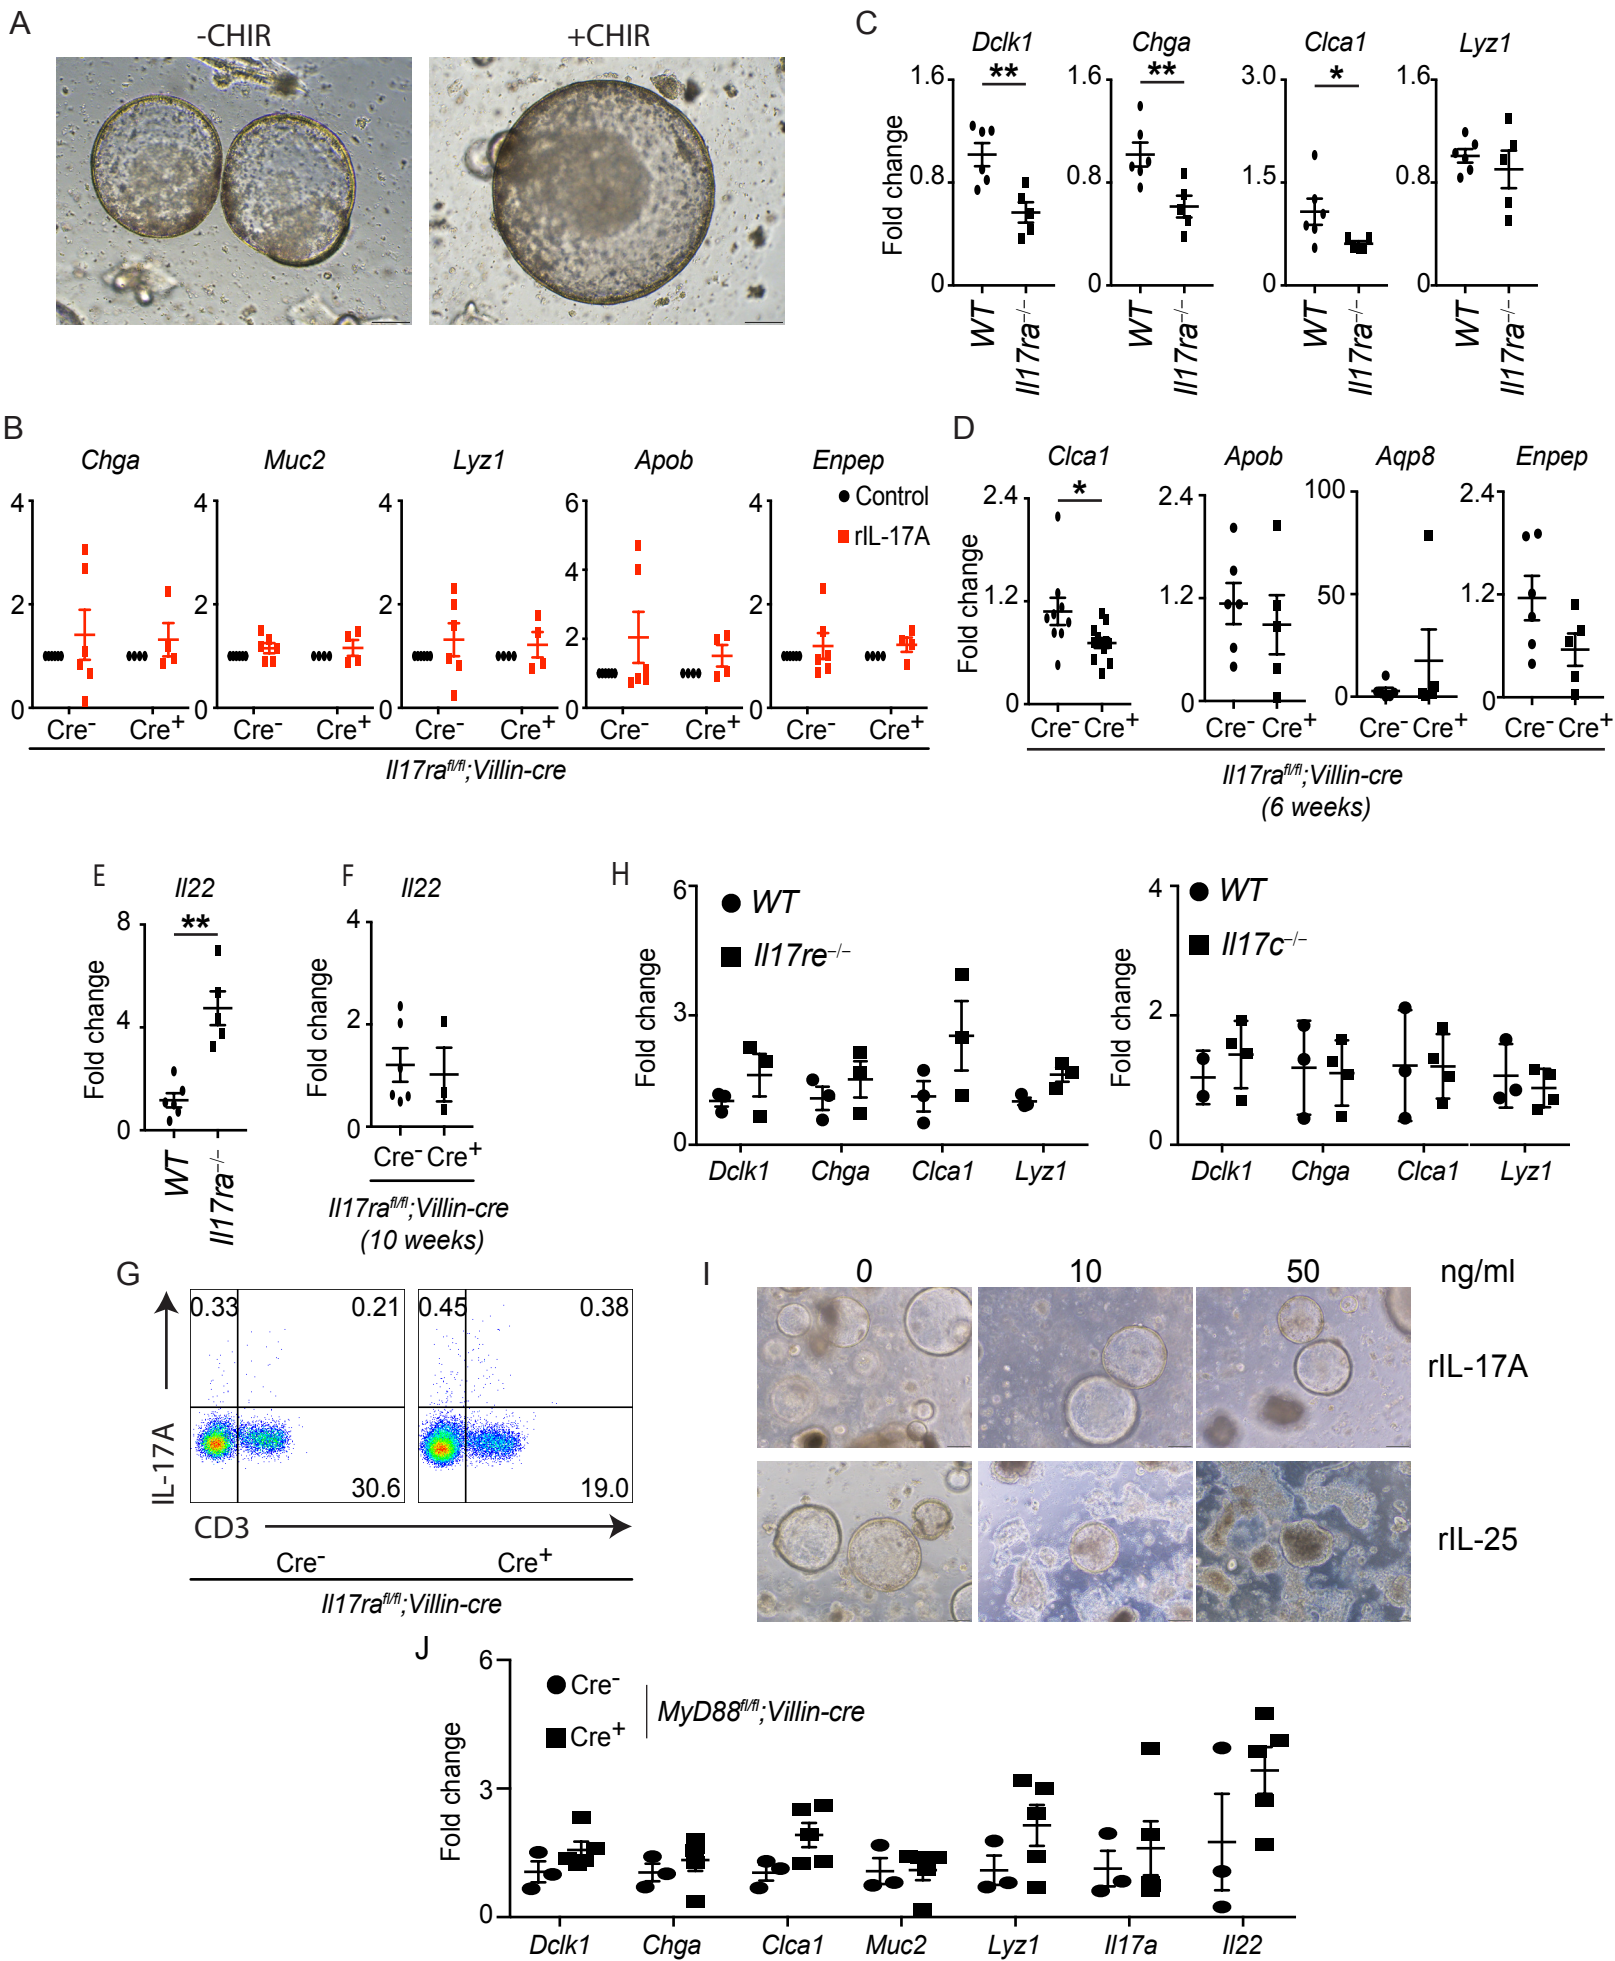

**Supplemental Figure 1. Secretory cell defects in germ-line *Il17ra*<sup>-/-</sup> mice, related to Figure 1.** **A)** Crypts were isolated from *Il17ra*<sup>fl/fl</sup>;*Villin-cre* mice and seeded for organoid culture with or without CHIR99021 (CHIR). The size of organoids was monitored and the images were taken on day 6 (left panel: without CHIR; right panel: with CHIR). **B)** Crypts were isolated from *Il17ra*<sup>fl/fl</sup>;*Villin-cre* mice for organoid culture (without CHIR99021) under the treatment of recombinant IL-17A (50 ng/ml). RNA was extracted on day 6 and the expression of *Chga*, *Muc2*, *Lyz1*, *Apob* and *Enpep* expression was analyzed by RT-PCR. **C)** RNA was extracted from the terminal ileum of naïve C57BL/6J (WT) and *Il17ra*<sup>-/-</sup> mice. The expression of *Dclk1*, *Chga*, *Clca1* and *Lyz1* was analyzed by RT-PCR. **D)** RNA was extracted from the terminal ileum of naïve *Il17ra*<sup>fl/fl</sup>;*Villin-cre* mice at 6 weeks old. The expression of *Clca1*, *Apob*, *Aqp8* and *Enpep* was analyzed by RT-PCR. **E)** RNA was extracted from the terminal ileum of naïve C57BL/6J (WT) and *Il17ra*<sup>-/-</sup> mice. The expression of *Il22* was analyzed by RT-PCR. **F)** RNA was extracted from the terminal ileum of naïve *Il17ra*<sup>fl/fl</sup>;*Villin-cre* mice at 10 weeks old. The expression of *Il22* was analyzed by RT-PCR. **G)** Leukocytes were isolated from the small intestine lamina propria of *Il17ra*<sup>fl/fl</sup>;*Villin-cre* mice. Flow cytometry was utilized to analyze IL-17A production in CD45<sup>+</sup> cells. **H)** RNA was extracted from the terminal ileum of *Il17re*<sup>-/-</sup> and *Il17c*<sup>-/-</sup> mice. The expression of *Dclk1*, *Chga*, *Clca1* and *Lyz1* was analyzed by RT-PCR. **I)** Crypts were isolated from the ileum of *ATOH1-EGFP* mice. Primary organoids were cultured in the presence of recombinant IL-17A or IL-25 and imaged on day 6. **J)** RNA was extracted from the terminal ileum of *MyD88*<sup>fl/fl</sup>;*Villin-cre* mice. The expression of *Dclk1*, *Chga*, *Clca1*, *Muc2*, *Lyz1*, *Il17a* and *Il22* was analyzed by RT-PCR.

Figure S1B, S1D and S1F were generated from 2-3 independent experiments. Figure S1H and S1J were generated from at least 3 mice in each group. Figure S1A, S1G and S1I are the representative images of at least 3 mice in each group. Data are presented as mean± SEM in all graphs. Scale bars in relevant figures equal 100 μm (1A, 1I). \**P* ≤ 0.05; \*\**P* ≤ 0.01 (Two-Way ANOVA in B, Mann-Whitney test, two-tailed in C-F, H and J)

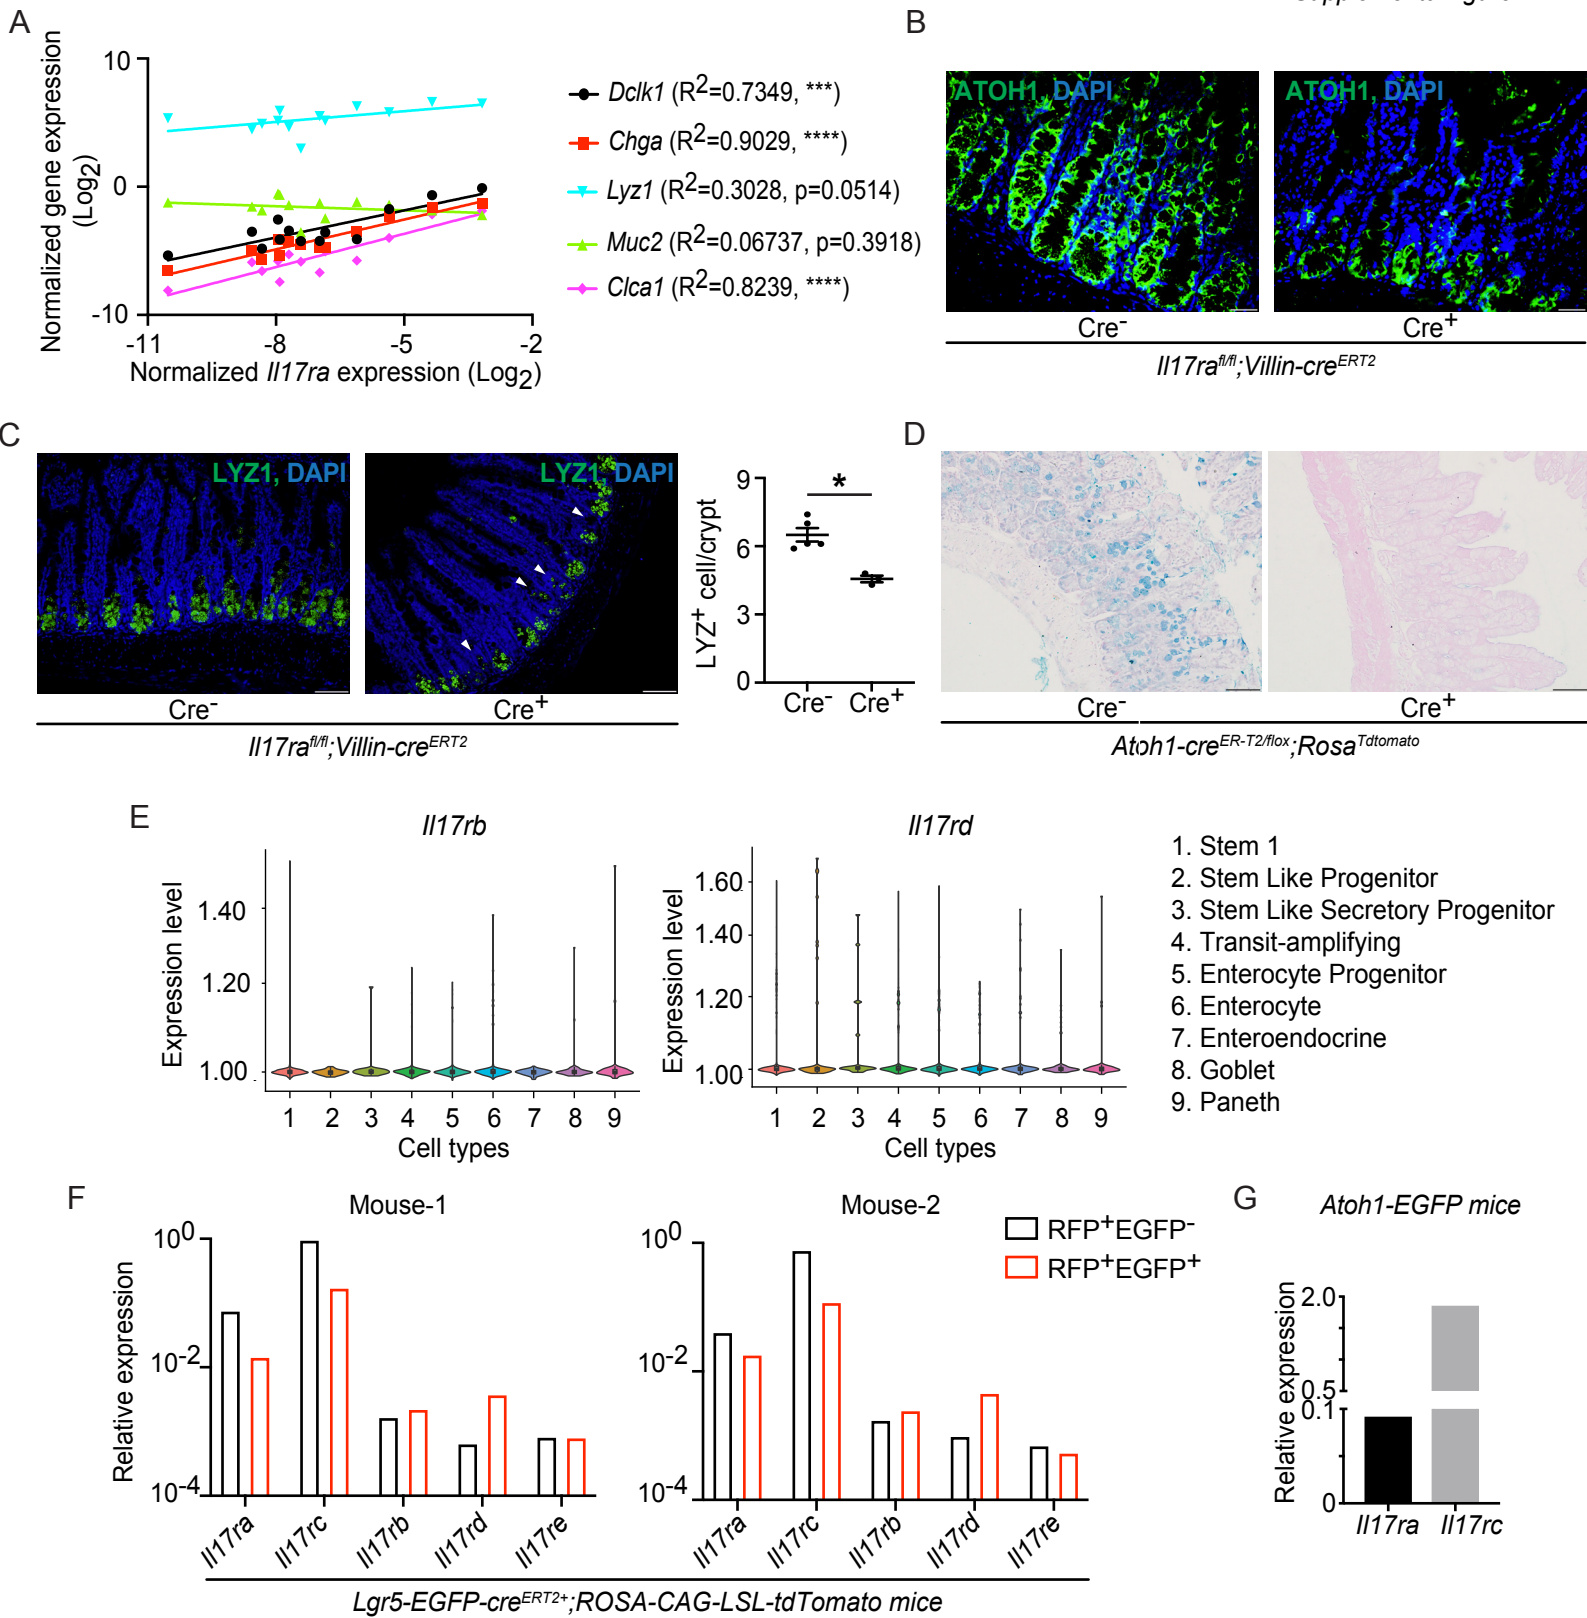

**Supplemental Figure 2. Characterization of IL-17 receptor expression in different cell types, related to Figures 2 and 3. A-C)** *Il17ra*<sup>fl/fl</sup>;*Villin-cre*<sup>ERT2</sup> mice were injected with tamoxifen for 5 continuous days. RNA was extracted from the terminal ileum on day 11. The correlation of *Il17ra* expression with secretory markers was analyzed by RT-PCR (A). The terminal ileum was stained with anti-ATOH1 (B) or anti-LYZ1 (C, left panel). LYZ1<sup>+</sup> cell/crypt is counted (C, right panel). **D)** *Atoh1-cre*<sup>ER-T2/flox</sup>;*Rosa*<sup>tdtomato</sup> mice were injected with tamoxifen for 3 continuous days. The terminal ileum was harvested at one week post the last tamoxifen injection and stained with alcian blue. **E)** Single cell RNA-seq data of C57BL/6J primary small intestinal organoids depict the expression of *Il17rb* and *Il17rd* in indicated cells of the intestinal epithelium. **F)** Cells were sorted from the small intestine of *Lgr5-EGFP-cre*<sup>ERT2+</sup>;*ROSA-CAG-LSL-tdTomato* mice after tamoxifen injection. The expression of IL-17 receptors in the sorted cells was analyzed by RT-PCR. **G)** EGFP<sup>+</sup> cells were sorted from ATOH1-EGFP mice. RT-PCR data depict the expression of *Il17ra* and *Il17rc*.

Figure S2A was generated from 2 independent experiments. Figure S2B, S2C and S2D were representative of at least 3 mice in each group. Data are presented as mean  $\pm$  SEM in all graphs. Scale bars in relevant figures equal 20  $\mu$ m (2B), 50  $\mu$ m (2C, 2D). \* $P \leq 0.05$ ; \*\*\* $P \leq 0.001$ ; \*\*\*\* $P \leq 0.0001$  (Simple linear regression in A and Mann-Whitney test, two-tailed in C).

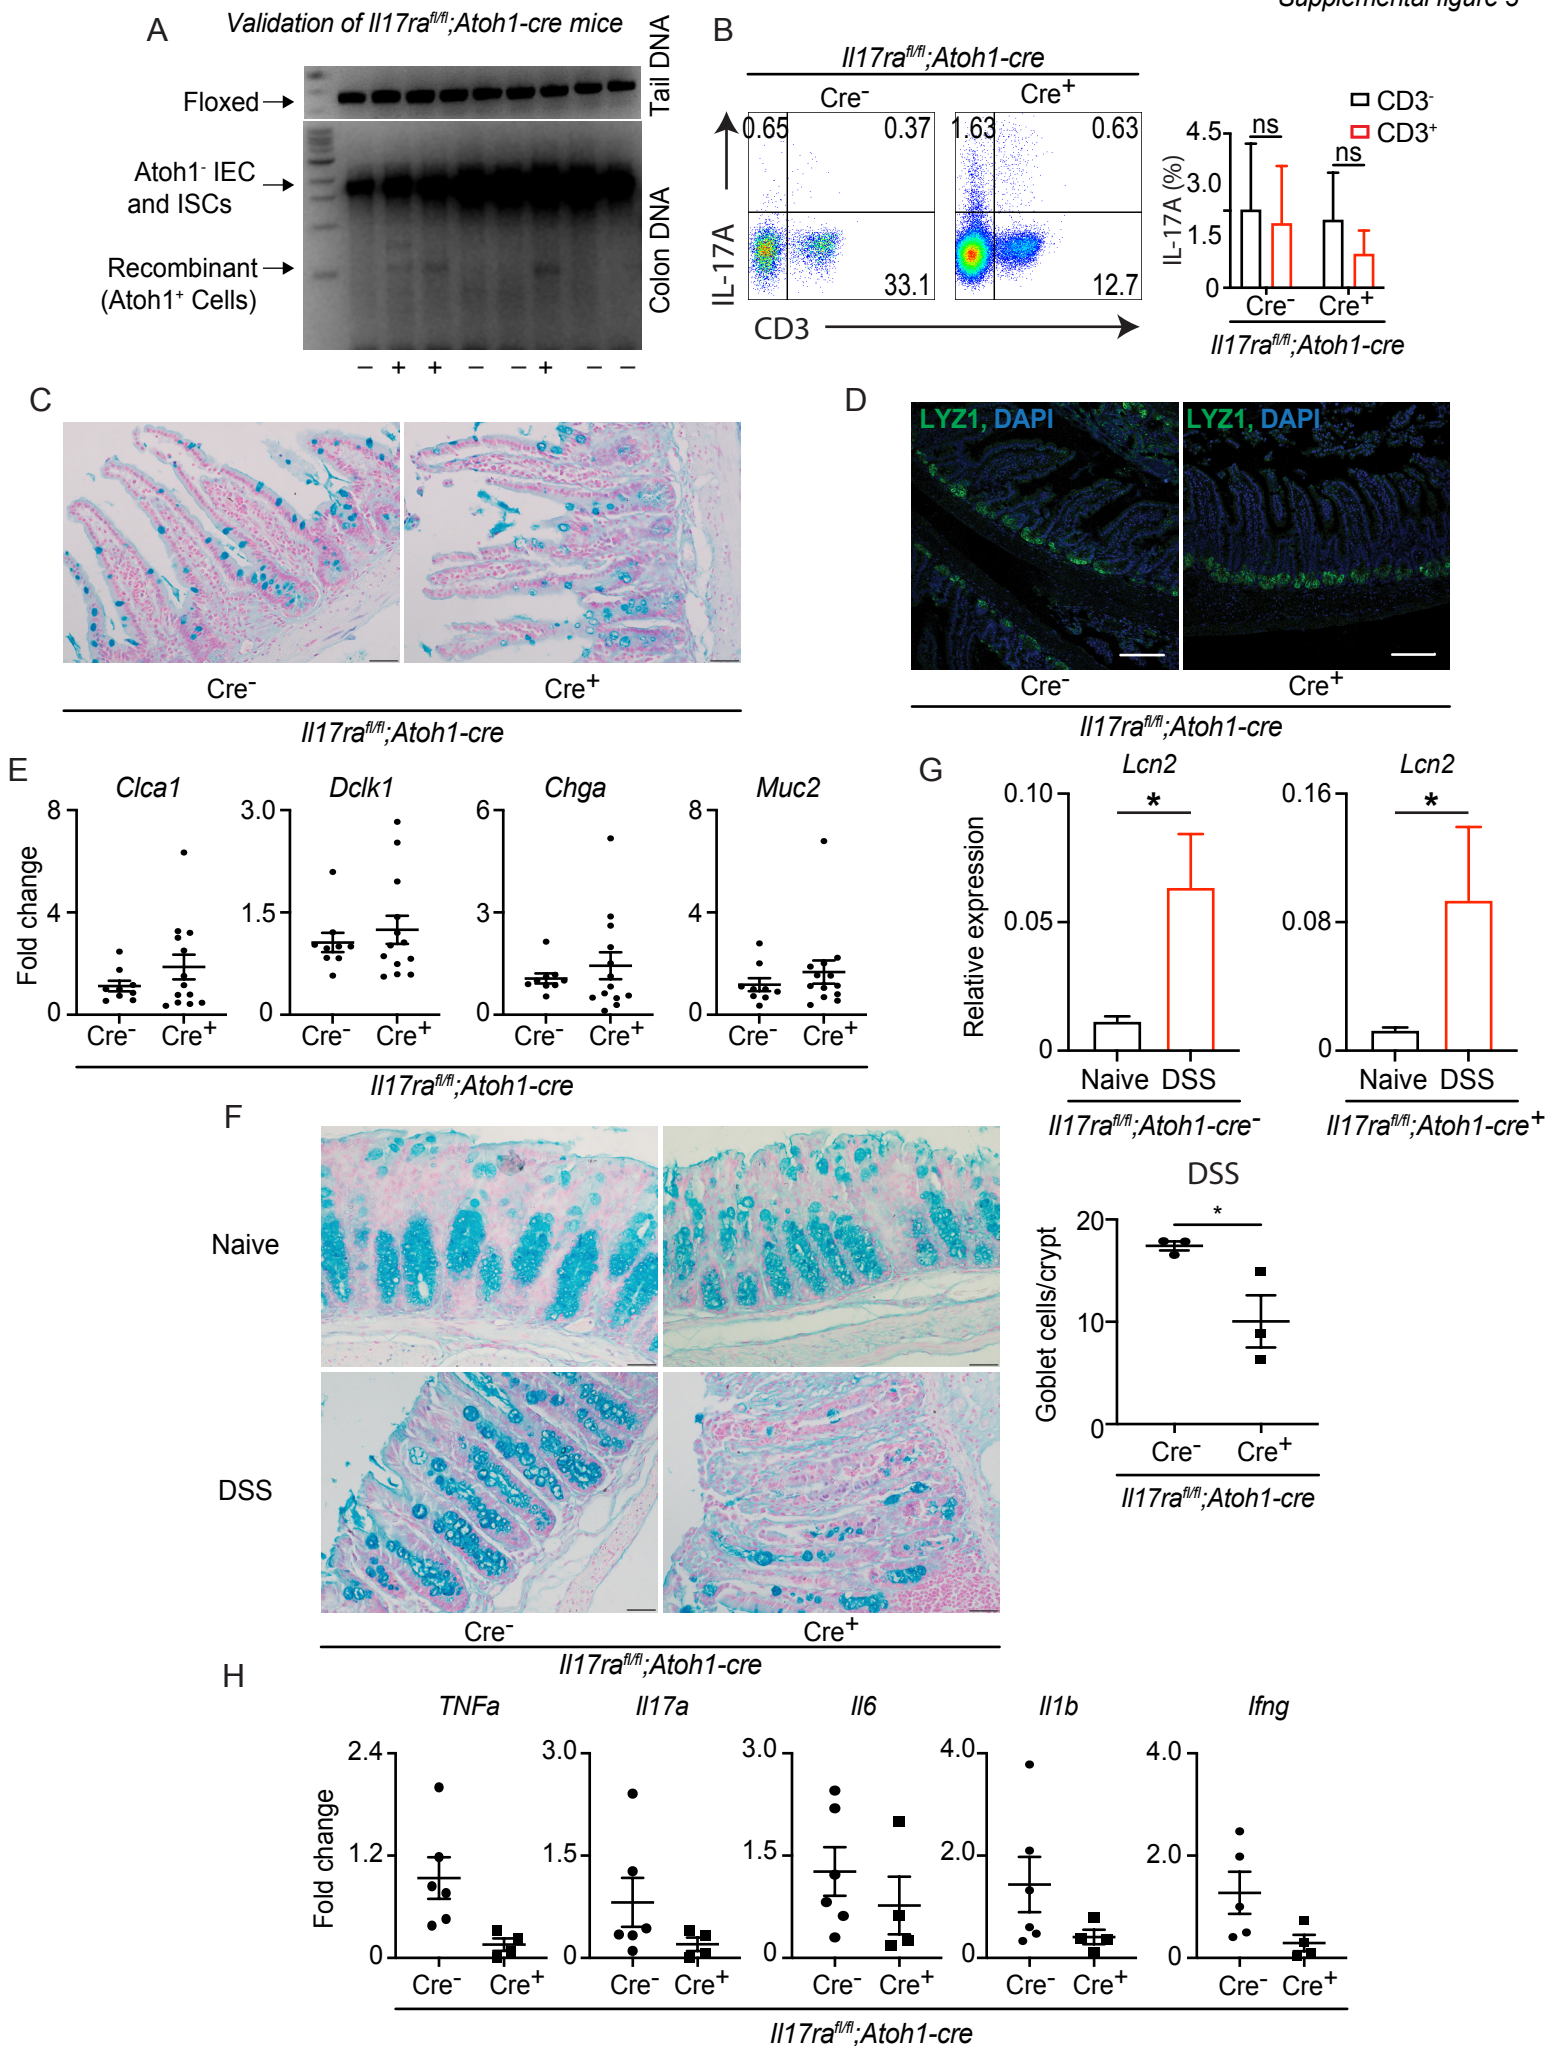

**Supplemental Figure 3. Characterization of *Il17ra<sup>fl/fl</sup>;Atoh1-cre* mice, related to Figure 3. A-**

**E)** Agarose gel PCR shows recombination of the IL-17RA allele in the colon of naïve *Il17ra<sup>fl/fl</sup>;Atoh1-cre* mice (A). Lamina propria leukocytes were isolated from the small intestine of naïve *Il17ra<sup>fl/fl</sup>;Atoh1-cre* mice. IL-17A production in CD45<sup>+</sup> cells was analyzed by flow cytometry (B, left panel) and the percentage was plotted (right panel). The terminal ileum was harvested at 6 weeks old and stained with alcian blue (C) and anti-LYZ1 (D). RNA was extracted from the distal colon and the expression of *Clca1*, *Dclk1*, *Chga* and *Muc2* was analyzed by RT-PCR (E). **F)** Distal colon tissues were harvested from naïve (upper row, left panel) or 2.5% DSS-treated (lower row, left panel) *Il17ra<sup>fl/fl</sup>;Atoh1-cre* mice and stained with alcian blue. The number of goblet cells (alcian blue<sup>+</sup>) in DSS-treated mice was counted (right panel). **G)** RT-PCR depicts the expression of *Lcn2* in the terminal ileum of *Il17ra<sup>fl/fl</sup>;Atoh1-cre* mice on day 6 of 2.5% DSS treatment. **H)** The terminal ileum of *Il17ra<sup>fl/fl</sup>;Atoh1-cre* mice was harvested on day 9 of 2.5% DSS followed by water treatment. The expression of *Tnfa*, *Il17a*, *Il6*, *Il1b* and *Ifng* was analyzed by RT-PCR.

Figure S3E, S3G and S3H were generated from 2-3 independent experiments. Figure S3B, S3C, S3D and S3F are representative of at least 3 mice in each group. Data are presented as mean  $\pm$  SEM in all graphs. Scale bars in relevant figures equal 50  $\mu$ m (3C, 3D), 20  $\mu$ m (3F). \* $P \leq 0.05$  (Two-way ANOVA in B, Mann-Whitney test, two-tailed in E and H, Student's t-test in F and G).

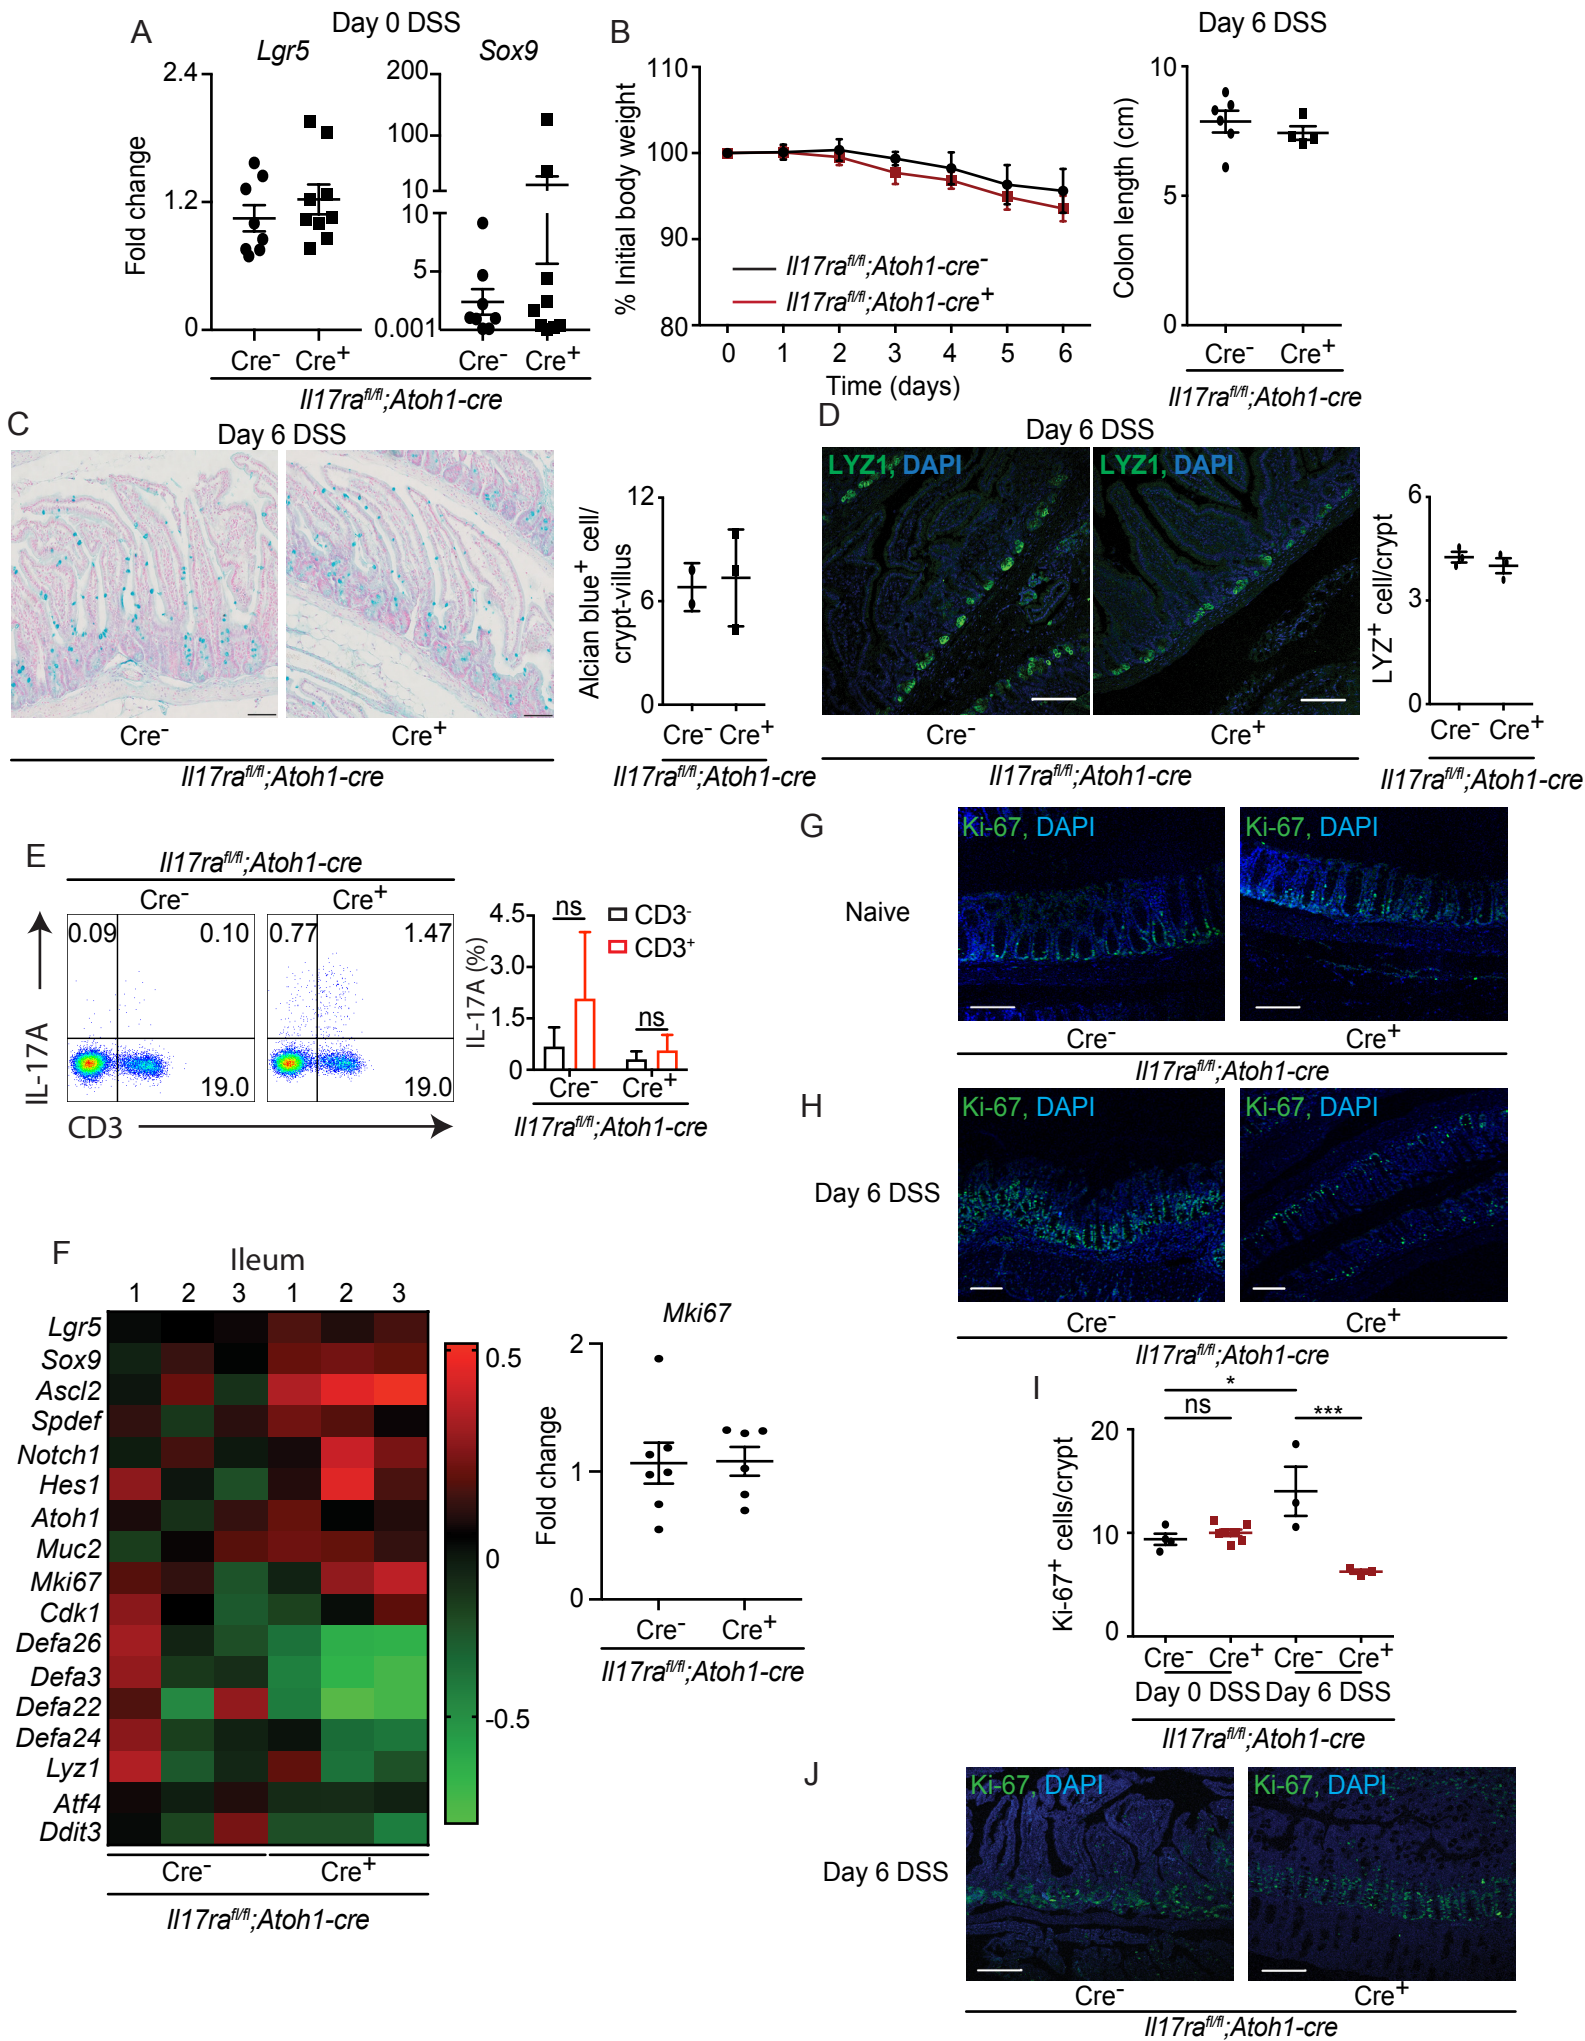

**Supplemental Figure 4. *Il17ra<sup>fl/fl</sup>;Atoh1-cre<sup>+</sup>* mice did not display colonic and ileal defects after DSS treatment for 6 days, related to Figure 5. A)**

The terminal ileum was isolated from naïve *Il17ra<sup>fl/fl</sup>;Atoh1-cre* mice and the expression of *Lgr5* and *Sox9* was analyzed by RT-PCR. **B-F)** *Il17ra<sup>fl/fl</sup>;Atoh1-cre* mice were treated with 2.5% DSS for 6 days. The weight loss was recorded daily (B, left panel). The colon was harvested on day 6 and the colon length was measured (B, right panel). Terminal ileum tissues were stained with alcian blue (C, left panel) and anti-LYZ1 (D, left panel). Alcian blue<sup>+</sup> cells/crypt-villus (C, right panel) and LYZ1<sup>+</sup>/crypt (D, right panel) were counted. Lamina propria leukocytes were isolated from the ileum of *Il17ra<sup>fl/fl</sup>;Atoh1-cre* mice on day 6 of DSS treatment. IL-17A production in CD45<sup>+</sup> cells was analyzed by flow cytometry (E, left panel) and the percentage of IL-17A producing cells was graphed (E, right panel). RNA-seq depicts the gene expression in the terminal ileum harvested on day 6 of DSS treatment (F, left panel). *Mki67* expression in the terminal ileum on day 6 was further confirmed by RT-PCR (F, right panel). **G-I)** The distal colon was harvested on day 0 (G) or day 6 (H) of 2.5% DSS treatment and stained with anti-Ki-67. Ki-67<sup>+</sup> cells were counted (I). **J)** The terminal ileum was harvested on day 6 of 2.5% DSS treatment and stained with anti-Ki-67.

Figure S4A and S4B were generated from two independent experiments. Except for S4C (2-3 mice), figure S4D, S4E, S4G, S4H and S4J were the representative images of at least 3 mice in each group. Data are presented as mean ± SD in S4C and mean ± SEM in other graphs. Scale bars in relevant figures equal 50 µm (4C, 4D), 100 µm (4G, 4H, 4J). \* $P \leq 0.05$ ; \*\*\* $P \leq 0.001$  (Mann-Whitney test, two-tailed in A, B (right panel), C (right panel), D (right panel) and F, Two-way ANOVA in B (left panel) and E (right panel), One-way ANOVA in I)



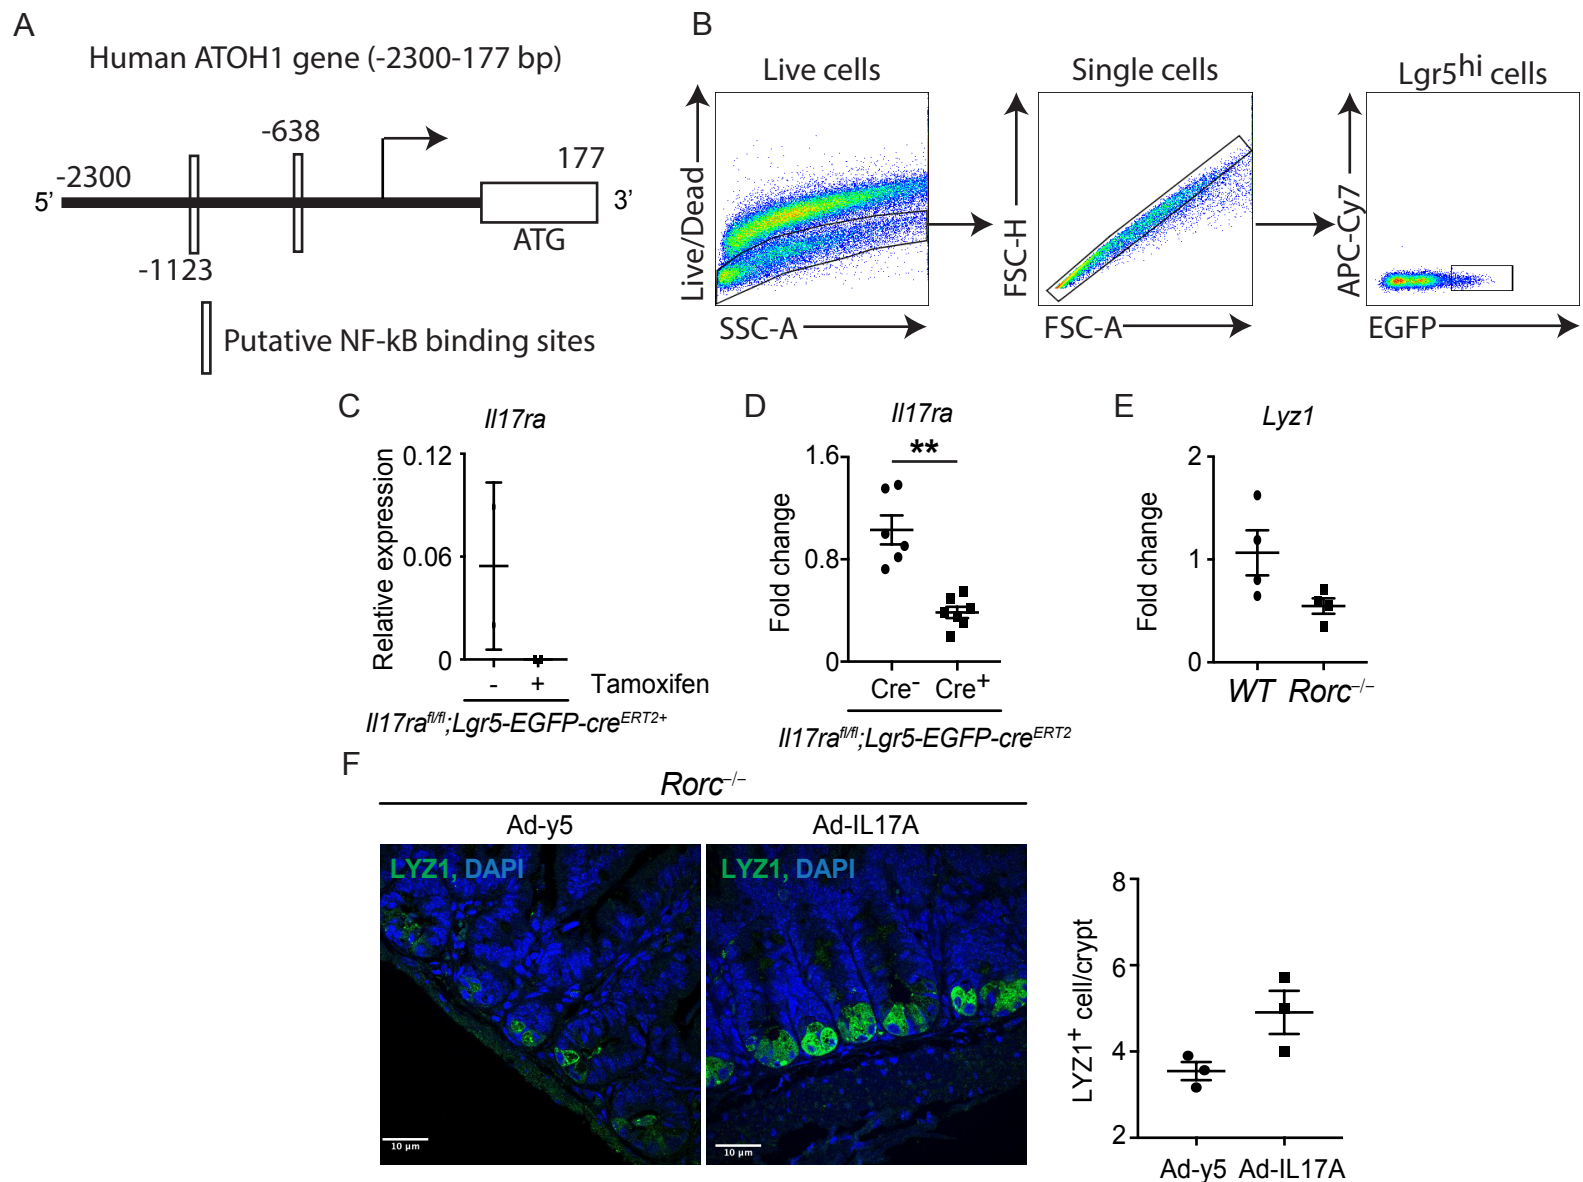

**Supplemental Figure 5. IL-17A delivery leads to increased number of LYZ1<sup>+</sup> cells, related to Figures 5 and 6.** **A)** Putative NF- $\kappa$ B binding sites predicted in the human *ATOH1* promoter. **B)** Crypts were isolated from the ileum of *Il17ra*<sup>fl/fl</sup>;*Lgr5-EGFP-cre*<sup>ERT2</sup> mice and processed for flow cytometry. The figure shows the gating strategy for EGFP<sup>hi</sup> cells (Lgr5<sup>+</sup> ISCs). **C-D)** *Il17ra*<sup>fl/fl</sup>;*Lgr5-EGFP-cre*<sup>ERT2</sup> mice were injected with corn oil or tamoxifen for 5 continuous days. Crypts were isolated and EGFP<sup>hi</sup> cells (Lgr5<sup>+</sup> ISCs) were sorted by FACS. RT-PCR data confirmed the deletion of *Il17ra* in sorted Lgr5<sup>+</sup> ISCs (C). The knockout of *Il17ra* in the terminal ileum was further demonstrated by RT-PCR (D). **E)** RT-PCR data depict *Lyz1* expression in the terminal ileum of C57BL/6J (WT) and *Rorc*<sup>-/-</sup> mice. **F)** *Rorc*<sup>-/-</sup> mice were injected with adenovirus-IL17A (Ad-IL-17A) or empty vector (Ad-Y5) and the tissues were harvested at 7 days post injection. The terminal ileum was stained with anti-LYZ1 (left panel) and the number of LYZ1<sup>+</sup> cells/crypt was plotted (right panel).

Figure S5D was generated from two independent experiments. Figure 5E was generated from 4 mice in each group. Figure 5F is the representative image of 3 mice in each group. Data are presented as mean  $\pm$  SD in S5C and mean  $\pm$  SEM in other graphs. Scale bars in relevant figures equal 10  $\mu$ m (5F). \*\* $P \leq 0.01$  (Mann-Whitney test, two-tailed in D-F).

A

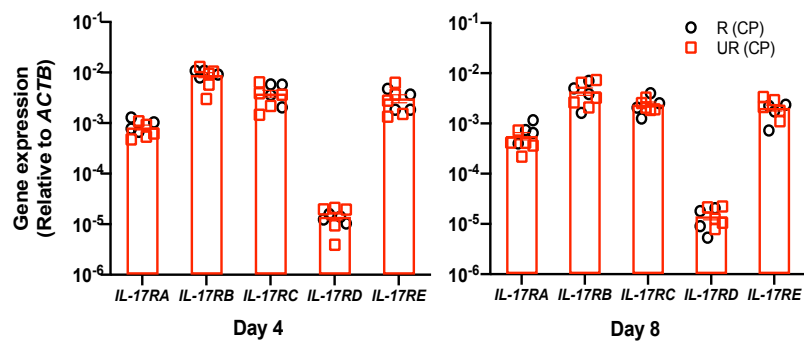

B

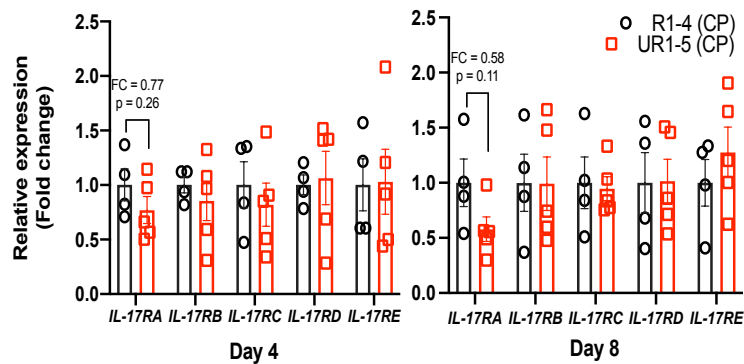

C

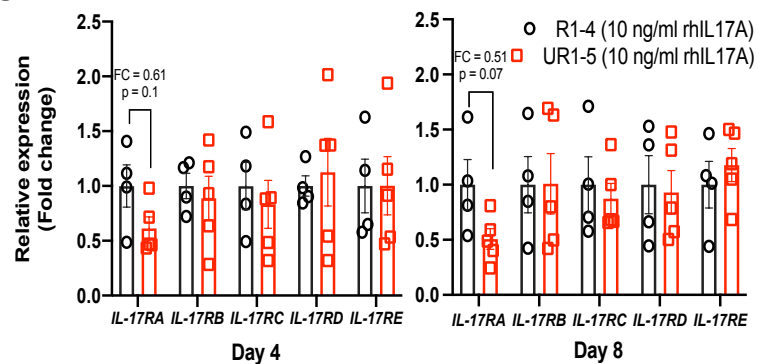

D

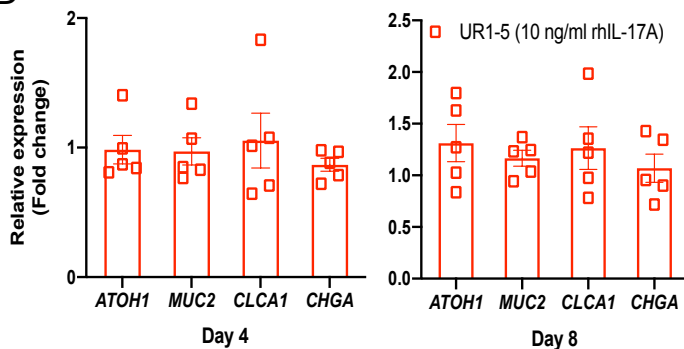

E

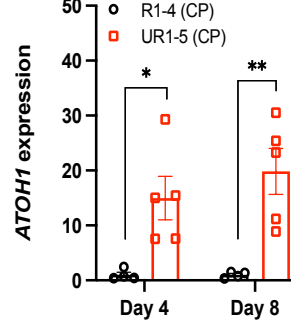

F

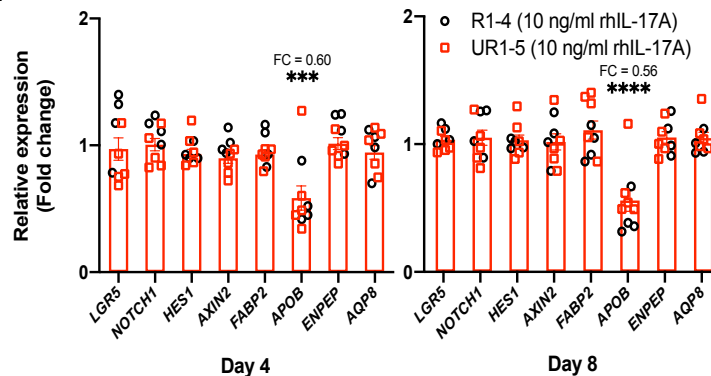

**Supplemental Figure 6. Transcript analysis of IL-17A-responsive (R) and -unresponsive (UR) lines stimulated with rhIL-17A, related to Figure 7. A)** RT-PCR analysis of IL-17 receptor genes (*IL-17RA*, *IL-17RB*, *IL-17RC*, *IL-17RD*, and *IL-17RE*) among R and UR lines without rhIL-17A stimulation on days 4 (left) and 8 (right). **B and C)** Fold change of the IL-17 receptor gene expression between the R and UR lines treated with either CP (B) or rhIL-17A (C) on days 4 (left) and 8 (right). **D)** RT-PCR data depicting *ATOH1*, *MUC2*, *CLCA1*, and *CHGA* expression among the rhIL-17A-stimulated UR lines on days 4 (left) and 8 (right). **E)** RT-PCR analysis of *ATOH1* expression in the R or UR lines on days 4 and 8. **F)** Fold change of *LGR5*, *NOTCH1*, *HES1*, *AXIN2*, *FABP2*, *APOB*, *ENPEP*, and *AQP8* expression among the rhIL-17A-stimulated R and UR lines on days 4 (left) and 8 (right).

Data points in A-F are mean of three technical replicates of individual lines. Bars represent mean  $\pm$  SEM, and at least three independent experiments were performed. CP, carrier protein; FC, fold change. \* $P \leq 0.05$ ; \*\* $P \leq 0.01$ ; \*\*\* $P \leq 0.001$ ; \*\*\*\* $P \leq 0.0001$  (unpaired t test, two-tailed in A-F).

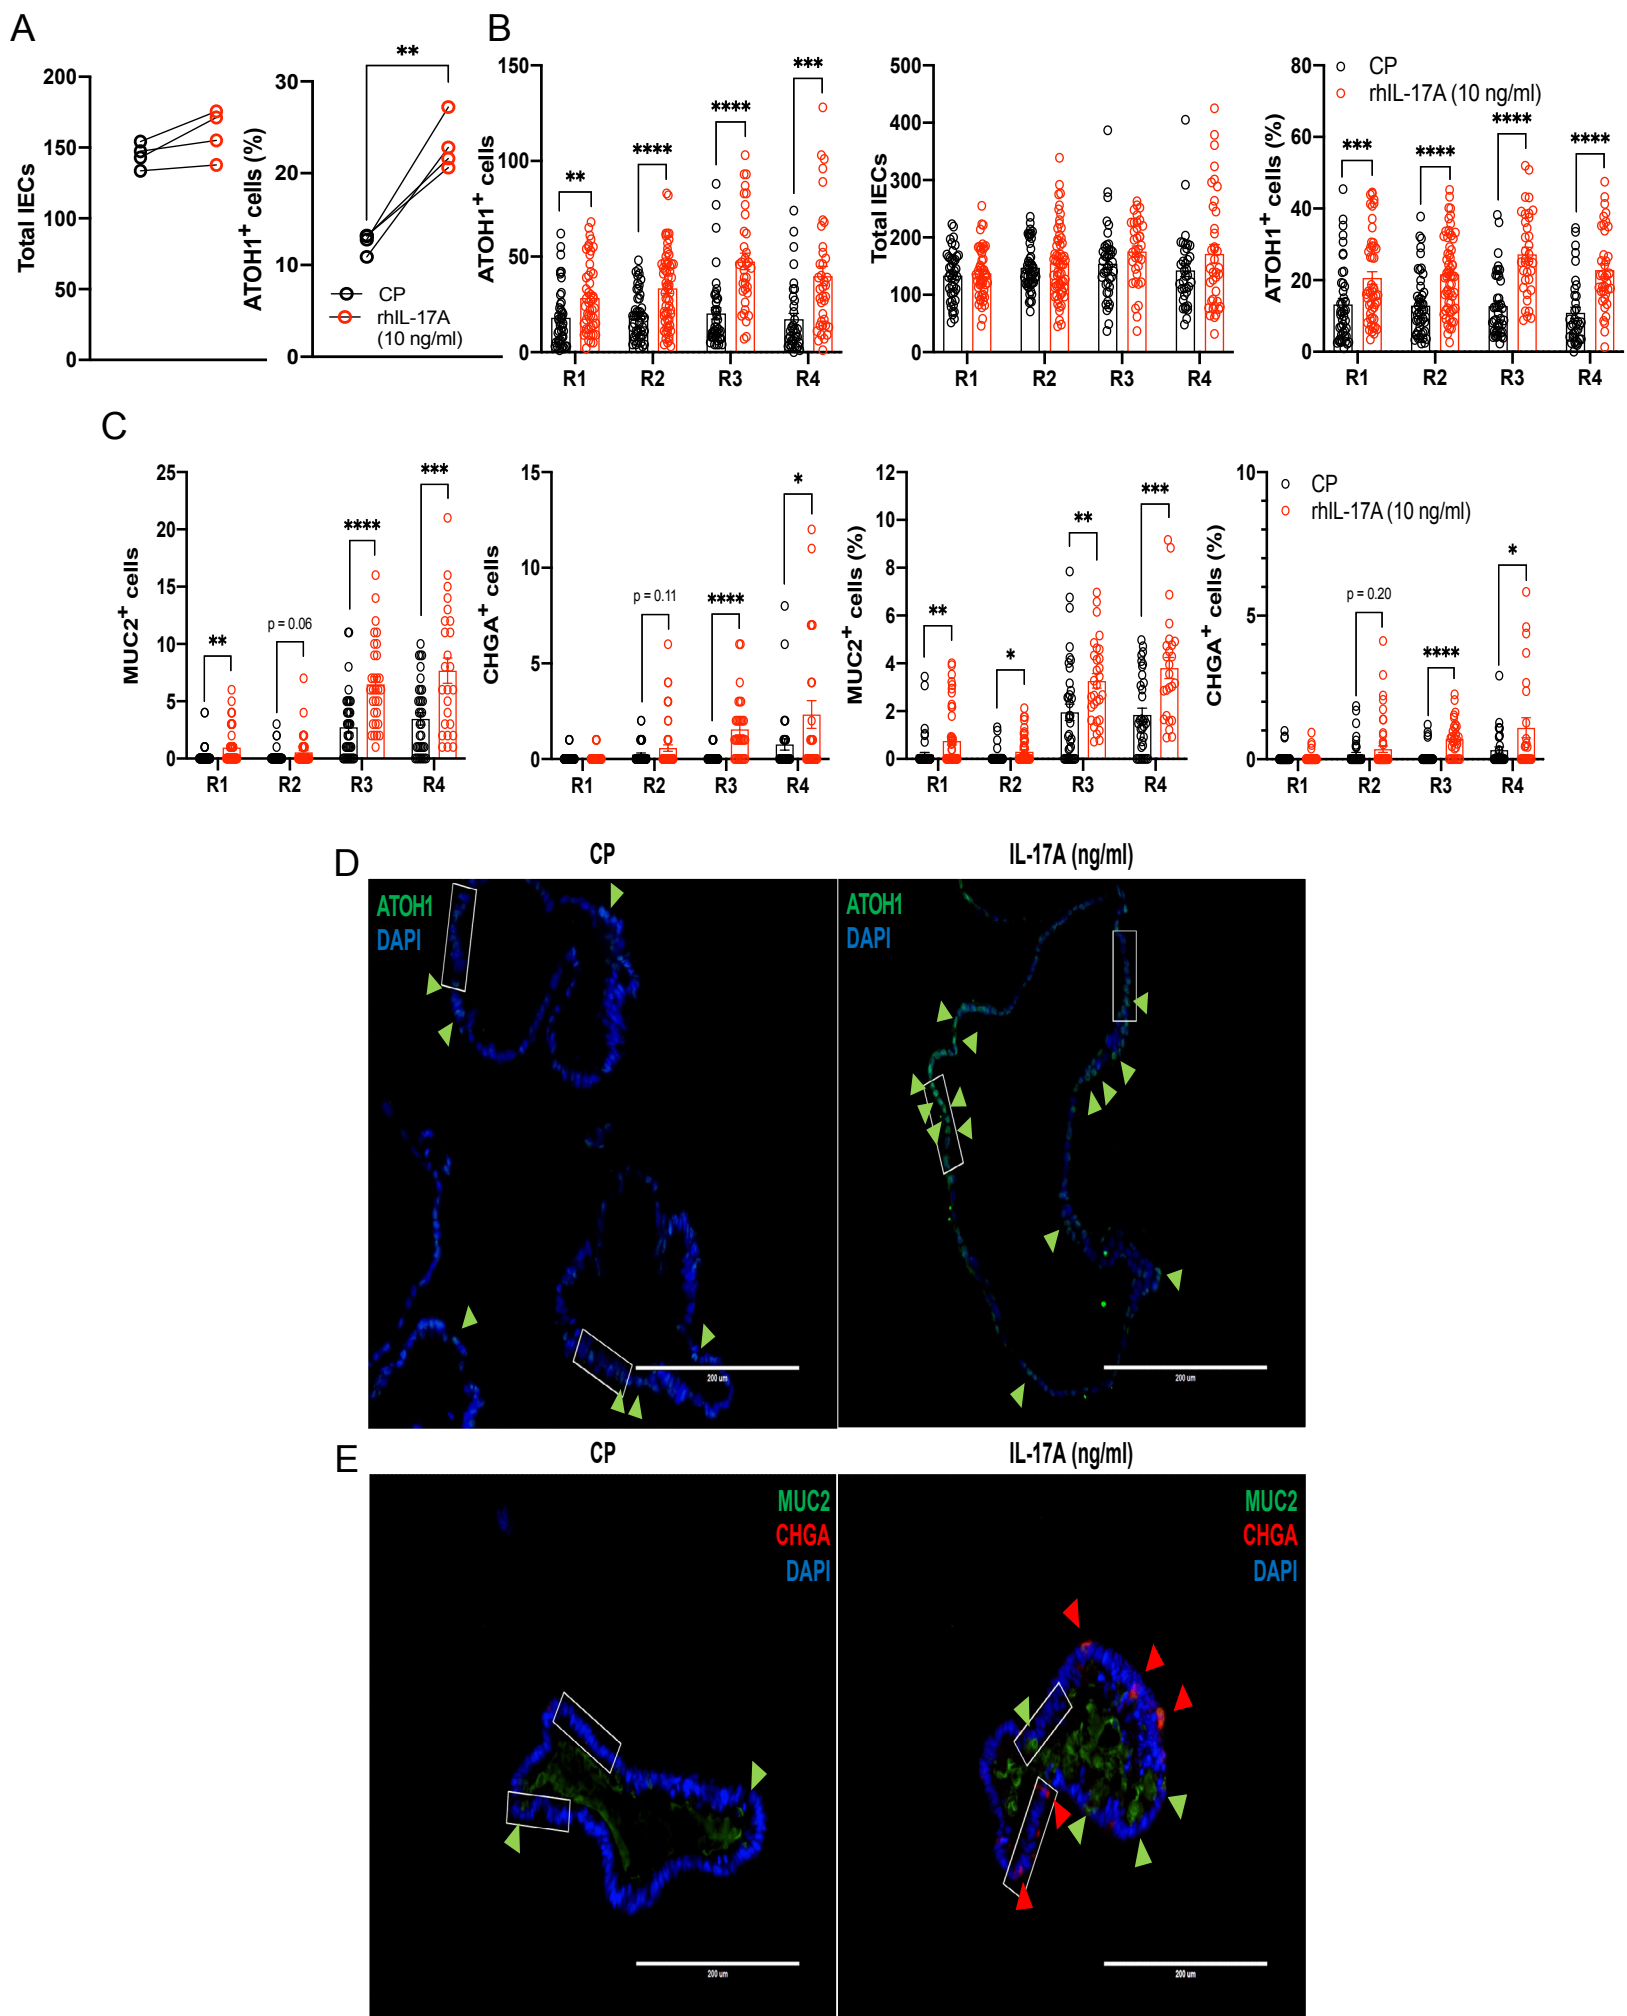

**Supplemental Figure 7. Immunohistochemistry analysis of IL-17A-responsive (R) and -unresponsive (UR) lines stimulated with rhIL-17A, related to Figure 7. A)** Total number of IECs (left) and frequency of ATOH1<sup>+</sup> cells normalized to total IECs (right) among the rhIL-17A-stimulated R lines on day 8. **B)** Total number of ATOH1<sup>+</sup> cells (left), total number of IECs (middle), and frequency of ATOH1<sup>+</sup> cells per total IECs (right) in each visual field from R lines with or without rhIL-17A stimulation on day 8. **C)** Total number of MUC2<sup>+</sup> or CHGA<sup>+</sup> cells (left) and frequency of MUC2<sup>+</sup> or CHGA<sup>+</sup> cells normalized to total IECs (right) in each visual field from R lines with or without rhIL-17A stimulation on day 8. **D and E)** Enlarged ATOH1 staining images (D) and MUC2 and CHGA co-staining images (E) in the rhIL-17A-stimulated R lines on day 8. Bars: 200  $\mu$ m. Data points in B and C represent visual field. Bars represent mean  $\pm$  SEM, and at least three independent experiments were performed. CP, carrier protein. \* $P \leq 0.05$ ; \*\* $P \leq 0.01$ ; \*\*\* $P \leq 0.001$ ; \*\*\*\* $P \leq 0.0001$  (paired t test, two-tailed in A, unpaired t test, two-tailed in B and C).

| Name | Tissue         | Sex | Age | Disease type | Inflammation | Organoid |
|------|----------------|-----|-----|--------------|--------------|----------|
| R1   | Duodenum       | M   | 37  | CD           | Non-inflamed | Cystic   |
| R2   | Duodenum       | F   | 67  | CD           | Non-inflamed | Cystic   |
| R3   | Terminal ileum | F   | 25  | Non-IBD      | Non-inflamed | Cystic   |
| R4   | Terminal ileum | M   | 34  | Non-IBD      | Non-inflamed | Cystic   |
| UR1  | Terminal ileum | M   | 37  | CD           | Non-inflamed | Budding  |
| UR2  | Terminal ileum | M   | 47  | CD           | Non-inflamed | Budding  |
| UR3  | Terminal ileum | M   | 23  | CD           | Non-inflamed | Budding  |
| UR4  | Terminal ileum | F   | 47  | Non-IBD      | Non-inflamed | Budding  |
| UR5  | Terminal ileum | M   | 29  | Non-IBD      | Non-inflamed | Budding  |

**Supplemental Table 1.** Subject information for human endoscopic specimens. Related to Figure 7.

M; Male, F; Female, CD; Crohn's disease.

| Target        | Organism            | Forward 5'-3'            | Reverse 5'-3'           |
|---------------|---------------------|--------------------------|-------------------------|
| <i>Il6</i>    | <i>Mus musculus</i> | TCCAATGCTCTCCTAACAGATAAG | CAAGATGAATTGGATGGTCTTG  |
| <i>Sox9</i>   | <i>Mus musculus</i> | AGTACCCGCATCTGCACAAC     | ACGAAGGGTCTCTTCTCGCT    |
| <i>Pigr</i>   | <i>Mus musculus</i> | ATGAGGCTCTACTTGTTCACGC   | CGCCTTCTATACTACTCACCTCC |
| <i>Lgr5</i>   | <i>Mus musculus</i> | CTACTCGAAGACTTACCCAGT    | GCATTGGGGTGAATGATAGCA   |
| <i>Hes1</i>   | <i>Mus musculus</i> | TGCCTTTCTCATCCCCAACG     | AGGTGACACTGCGTTAGGAC    |
| <i>Lcn2</i>   | <i>Mus musculus</i> | GGGAAATATGCACAGGTATCCTC  | CATGGCGAACTGGTTGTAGTC   |
| <i>Apob</i>   | <i>Mus musculus</i> | AAGCACCTCCGAAAGTACGTG    | CTCCAGCTCTACCTTACAGTTGA |
| <i>Enpep</i>  | <i>Mus musculus</i> | ATAGTGGGACTTTCTGTGGGT    | GGTCGTAGTGAAGTGGATTGATG |
| <i>Aqp8</i>   | <i>Mus musculus</i> | TGTGTAGTATGGACCTACCTGAG  | ACCGATAGACATCCGATGAAGAT |
| <i>Il17rb</i> | <i>Mus musculus</i> | GGCTGCCTAAACCACGTAATG    | CCCGTTGAATGAGAATCGTGT   |
| <i>Il17rd</i> | <i>Mus musculus</i> | AACAGCGGACTGCACAACAT     | GCAAGCGTACTGGCTGATG     |
| <i>Il17re</i> | <i>Mus musculus</i> | CAGTCCCAGTGACGCTAGAC     | ACCCACTAGAGCGGTGAGAG    |
| <i>Lrig1</i>  | <i>Mus musculus</i> | TTGAGGACTTGACGAATCTGC    | CTTGTTGTGCTGCAAAAAGAGAG |
| <i>Dil1</i>   | <i>Mus musculus</i> | GCAGGACCTTCTTTCCGCTAT    | AAGGGGAATCGGATGGGGTT    |
| <i>Ifng</i>   | <i>Mus musculus</i> | ATGAACGCTACACACTGCATC    | CCATCCTTTTGCCAGTTCTCTC  |
| <i>Il1b</i>   | <i>Mus musculus</i> | GCAACTGTTCTGAACTCAACT    | ATCTTTTGGGGTCCGTCAACT   |
| <i>IL17RA</i> | <i>Homo sapiens</i> | TTCTGTCCAAACTGAGGCATCA   | AGGGTCAACCACAAAGTGGC    |
| <i>IL17RB</i> | <i>Homo sapiens</i> | GCCCTTCCATGTCTGTGAA      | CAGGGGAGTGGTTGTGAAGT    |
| <i>IL17RC</i> | <i>Homo sapiens</i> | GCCCCATGGACAAATACATC     | ATCGGCTGAGTAGAGGAGCA    |
| <i>IL17RD</i> | <i>Homo sapiens</i> | CTGTCTCTGCCACTGATGGA     | CCAAGATCTGCTTTCATGA     |
| <i>IL17RE</i> | <i>Homo sapiens</i> | CTGCTGTCAGGTGGCTCA       | GGAAGACTTTTTGGATTCTGC   |
| <i>ATO1</i>   | <i>Homo sapiens</i> | GTCCGAGCTGCTACAAACG      | GTGGTGGTGGTTCGCTTTT     |
| <i>MUC2</i>   | <i>Homo sapiens</i> | GCTGCTATGTCGAGGACACC     | GGGAGGAGTTGGTACACACG    |
| <i>CLCA1</i>  | <i>Homo sapiens</i> | GCTGATGTTCTGGTTGCTGA     | CGTCAAATACTCCCATCGT     |
| <i>CHGA</i>   | <i>Homo sapiens</i> | TGTAGTGCTGAACCCACC       | CTCTCGCCTTCCGGATCT      |
| <i>LGR5</i>   | <i>Homo sapiens</i> | CAGCGTCTCACCTCCTACC      | TGGGAATGTATGTCAGAGCG    |
| <i>NOTCH1</i> | <i>Homo sapiens</i> | CGCACAAAGGTGTCTTCCAG     | AGGATCAGTGGCGTCGTG      |
| <i>HES1</i>   | <i>Homo sapiens</i> | AGTGAAGCACCTCCGGAAC      | CGTTCATGCACTCGCTGA      |
| <i>AXIN2</i>  | <i>Homo sapiens</i> | AGTGTGAGGTCCACGGAAAC     | CTGGTGCAAAGACATAGCCA    |
| <i>FABP2</i>  | <i>Homo sapiens</i> | AACTGAACCTCAGGGGGACCT    | CCTTTTGGCTTCTACTCCTTCA  |
| <i>APOB</i>   | <i>Homo sapiens</i> | GGAGCTGCTGGACATTGCTA     | ATGGCAGCTTCTGGATCAT     |
| <i>ENPEP</i>  | <i>Homo sapiens</i> | TGACACCGTTCACGTTAAGCA    | GGAAGAGGCAAGTAGGCTACCA  |
| <i>AQP8</i>   | <i>Homo sapiens</i> | GCGAGTGTCTGGTACGAAC      | CAGGCACCCGATGAAGATGAA   |
| <i>ACTB</i>   | <i>Homo sapiens</i> | CCCAGCCATGTACGTTGCTA     | TCACCGGAGTCCATCACGAT    |

Supplemental Table 2. Primer sequences for qPCR. Related to STAR Methods.
